# Supplementary material for: Timing of initiation of anti-retroviral therapy predicts post-treatment control of SIV replication
Source: PubMed Central journal article supplement (PMC10558076; doi:10.1371/journal.ppat.1011660), 2023-10-06
Supplement: ppat.1011660.s001.pdf [file ppat.1011660.s001.pdf]

| Study                                       | Virus                 | Virus dose                  | Viral load detection threshold (c/ml) | Treatment  |                         |          | N | Monkey's IDs  | Comments / setpoint time intervals                                                                | Known protective MHC-I alleles (A*01, B*08, B*17) | Reference |
|---------------------------------------------|-----------------------|-----------------------------|---------------------------------------|------------|-------------------------|----------|---|---------------|---------------------------------------------------------------------------------------------------|---------------------------------------------------|-----------|
|                                             |                       |                             |                                       | Initiation | Regimen                 | Duration |   |               |                                                                                                   |                                                   |           |
| <b>National Cancer Institute (Cohort 1)</b> |                       |                             |                                       |            |                         |          |   |               |                                                                                                   |                                                   |           |
| 1.a                                         | SIVmac239M (Barcoded) | 2.2x10 <sup>5</sup> IU (IV) | 14                                    | 4          | TFV, FTC, RAL, IDV, RTV | 301      | 2 | DEJX, DFGV.   |                                                                                                   | All negative                                      | (1)       |
| 1.a                                         | SIVmac239M (Barcoded) | 2.2x10 <sup>5</sup> IU (IV) | 14                                    | 4          | TFV, FTC, RAL, IDV, RTV | 370      | 2 | DEJW, H090    |                                                                                                   | All negative                                      | (1)       |
| 1.a                                         | SIVmac239M (Barcoded) | 2.2x10 <sup>5</sup> IU (IV) | 14                                    | 4          | TFV, FTC, RAL, IDV, RTV | 478      | 2 | DEPI, H105    |                                                                                                   | All negative                                      | (1)       |
| 1.b                                         | SIVmac239M (Barcoded) | 2.2x10 <sup>5</sup> IU (IV) | 14                                    | 6          | TFV, FTC, RAL           | 81       | 3 | MK9, KMB, KZ2 |                                                                                                   | All A*01+                                         | (1)       |
| 1.c                                         | SIVmac239M (Barcoded) | 2.2x10 <sup>5</sup> IU (IV) | 14                                    | 27         | TFV, FTC, RAL, IDV, RTV | 322      | 1 | DEVW          |                                                                                                   | Negative                                          | (2)       |
| 1.c                                         | SIVmac239M (Barcoded) | 2.2x10 <sup>5</sup> IU (IV) | 14                                    | 27         | TFV, FTC, RAL, IDV, RTV | 369      | 2 | DEVX, ZJ15    |                                                                                                   | All negative                                      | (2)       |
| 1.c                                         | SIVmac239M (Barcoded) | 2.2x10 <sup>5</sup> IU (IV) | 14                                    | 27         | TFV, FTC, RAL, IDV, RTV | 476      | 2 | DEVJ, H106    |                                                                                                   | All negative                                      | (2)       |
| 1.d                                         | SIVmac239X            | 1.0x10 <sup>4</sup> IU (IR) | 14                                    | 223        | TDF, FTC, DTG           | 409      | 1 | T028          | Darunavir monotherapy started on day 124 and was maintained for the first 316 days of ART         | Negative                                          |           |
| 1.d                                         | SIVmac239X            | 1.0x10 <sup>3</sup> IU (IR) | 14                                    | 356        | TDF, FTC, DTG           | 410      | 2 | T158, T159    | Darunavir monotherapy started on day 202 or 213 and was maintained for the first 311 days of ART. | All A*01+                                         |           |
| 1.d                                         | SIVmac239X            | 1.0x10 <sup>3</sup> IU (IR) | 14                                    | 356        | TDF, FTC, DTG           | 218      | 1 | T156          | Darunavir monotherapy started on day 213 and was                                                  | A*01+                                             |           |

|                                                  |            |                             |               |     |                         |          |    |                                                                                                                              |                                                                                                                                                      |                                                                                                                      |     |
|--------------------------------------------------|------------|-----------------------------|---------------|-----|-------------------------|----------|----|------------------------------------------------------------------------------------------------------------------------------|------------------------------------------------------------------------------------------------------------------------------------------------------|----------------------------------------------------------------------------------------------------------------------|-----|
|                                                  |            |                             |               |     |                         |          |    |                                                                                                                              | maintained until the end of ART                                                                                                                      |                                                                                                                      |     |
| 1.d                                              | SIVmac239X | 3.0x10 <sup>2</sup> IU (IR) | 14            | 377 | TDF, FTC, DTG           | 410      | 1  | T154                                                                                                                         | Darunavir monotherapy started on day 223 and was maintained for the first 311 days of ART.                                                           | A*01+                                                                                                                |     |
| <b>Oregon Regional Primate Center (Cohort 2)</b> |            |                             |               |     |                         |          |    |                                                                                                                              |                                                                                                                                                      |                                                                                                                      |     |
| 2.a                                              | SIVmac239X | 2 FFU (IV)                  | 30 or 1       | 6   | TDF, FTC, DTG           | 605      | 13 | 24515, 24824, 26011, 28213, 23233, 27507, 25749, 27706, 27765, 28217, 23813, 25389, 26059                                    | Vaccinated with CMV/SIV or control RhCMV.<br>*The setpoint viral load at rebound in the subject 23813 was estimated between days 30 and 56.          | 23233 – B*17+;<br>25389 – B*08+,<br>B*17+;<br>26059 – A*01+,<br>B*17+;<br>24515 – B*08+,<br>B*17+;<br>26011 – A*01+. | (3) |
| 2.a                                              | SIVmac239X | 2 FFU (IV)                  | 30 or 1       | 7   | TDF, FTC, DTG           | 604      | 10 | 26470, 25420, 27812, 28232, 27826, 26475, 28092, 25280, 28473, 27046                                                         | Vaccinated with CMV/SIV or control RhCMV.                                                                                                            | 25420 – A*01+;<br>28232 – B*17+;<br>27046 – A*01+.                                                                   | (3) |
| 2.a                                              | SIVmac239X | 2 FFU (IV)                  | 30 or 1       | 8-9 | TDF, FTC, DTG           | 603, 602 | 4  | 25763, 22674, 22548, 28219                                                                                                   | Vaccinated with CMV/SIV or control RhCMV.                                                                                                            | 25763 – A*01+;<br>28219 – A*01+,<br>B*17+.                                                                           | (3) |
| 2.b                                              | SIVmac239X | 2 FFU (IV)                  | 30 or 15 or 1 | 12  | TDF, FTC, DTG           | 356      | 6  | 29258, 29277, 29529, 29710, 30649, 30709                                                                                     | Controls                                                                                                                                             | All negative                                                                                                         | (3) |
| 2.c                                              | SIVmac239X | 2 FFU (IV)                  | 30            | 42  | TDF, FTC, DTG, DRV, RTV | 928      | 18 | 27025, 27537, 27717, 27779, 27835, 27913, 27919, 28129, 28204, 28290, 28337, 28763, 27037, 27832, 27857, 27859, 28157, 28216 | Vaccinated with CMV/SIV or control RhCMV.<br>*The setpoint viral load in 14 out of 14 animals (with the available measurements after the day 30 post | 27025 – A*01+;<br>27913 – A*01+;<br>28204 – A*01+;<br>27859 – A*01+,<br>B*17+.                                       | (3) |

|                                                          |                       |                           |    |    |               |         |   |                                                  |                                                                                                                                                                                                                                                                                           |              |                                 |
|----------------------------------------------------------|-----------------------|---------------------------|----|----|---------------|---------|---|--------------------------------------------------|-------------------------------------------------------------------------------------------------------------------------------------------------------------------------------------------------------------------------------------------------------------------------------------------|--------------|---------------------------------|
|                                                          |                       |                           |    |    |               |         |   |                                                  | detection of virus) in primary infection was estimated on the interval of 30 – 32 days post detection (shortest duration) and 30 – 38 (longest duration).                                                                                                                                 |              |                                 |
| <b>Emory National Primate Research Center (Cohort 3)</b> |                       |                           |    |    |               |         |   |                                                  |                                                                                                                                                                                                                                                                                           |              |                                 |
| 3.a                                                      | SIVmac239M (Barcoded) | 1x10 <sup>4</sup> IU (IV) | 60 | 14 | FTC, TDF, DTG | 205/206 | 7 | RLm14, RNd15, RYk16, 14C207, 9_047, REe16, RJy13 | Controls only.<br>*The setpoint viral load in 6 out of 6 animals (with the available measurements after the day 30 post detection of virus) after treatment interruption was estimated on the interval of 30 – 47 days post detection (shortest duration) and 30 – 53 (longest duration). | All A*01+.   | Emory IACUC PROTO201 700655     |
| 3.b                                                      | SIVmac239             | 300 TCID50 (IV)           | 15 | 41 | FTC, TDF, DTG | 357     | 4 | 8R8, BV41, V304, 514                             | Controls only<br>* The setpoint viral load in primary infection in all animals was estimated between days 30 and 34 post viral detection.                                                                                                                                                 | All negative | Emory IACUC PROTO201 700007 (4) |
| 3.b                                                      | SIVmac239             | 300 TCID50 (IV)           | 15 | 43 | FTC, TDF, DTG | 357     | 2 | V314, V309                                       | Controls only.<br>* The setpoint viral load in primary infection in all animals was estimated                                                                                                                                                                                             | All negative | Emory IACUC PROTO201 700007 (4) |

|     |           |                 |    |    |               |         |    |                                                                                                                                                                                                                                                                                                 |                                                                                                                                                                                                                                                                                          |                                                                                                                         |     |
|-----|-----------|-----------------|----|----|---------------|---------|----|-------------------------------------------------------------------------------------------------------------------------------------------------------------------------------------------------------------------------------------------------------------------------------------------------|------------------------------------------------------------------------------------------------------------------------------------------------------------------------------------------------------------------------------------------------------------------------------------------|-------------------------------------------------------------------------------------------------------------------------|-----|
|     |           |                 |    |    |               |         |    |                                                                                                                                                                                                                                                                                                 | between days 30 and 36 post viral detection.                                                                                                                                                                                                                                             |                                                                                                                         |     |
| 3.c | SIVmac239 | 300 TCID50 (IV) | 30 | 60 | FTC, TDF, DTG | 265-438 | 41 | RHn16, RTj16, RAq16, RJr16, 138_14, RAI16, RVt16, RUm16, RVr16, RYi16, RYu16, RHs16, RZl16, RKt16, RZw15, RZn16, ROp16, RUv15, RFj16, RKi16, RQt16, RHk16, RIs16, RWn16, RLw16, RNi16, RQj16, RAg16, RGt16, RWs16, RPo16, RPn16, RFI16, RLt16, 82-13, RGi16, RJd16, 118-14, RTw16, RFu15, RHj16 | Treated with immune checkpoint blockade (ICB), controls. 40 animals were followed up until rebound.<br><br>*The setpoint viral load in all animals in primary infection was estimated on the interval of 30 – 42 days post detection (shortest duration) and 30 – 51 (longest duration). | RKt16 – A*01+; RHn16 – A*01+; RGi16 – A*01+; RPo16 – A*01+; RZw15 – A*01+; RIs16 – A*01+; RWn16 – A*01+; RVr16 – A*01+. | (5) |

**Table A: Summary of the cohorts.**

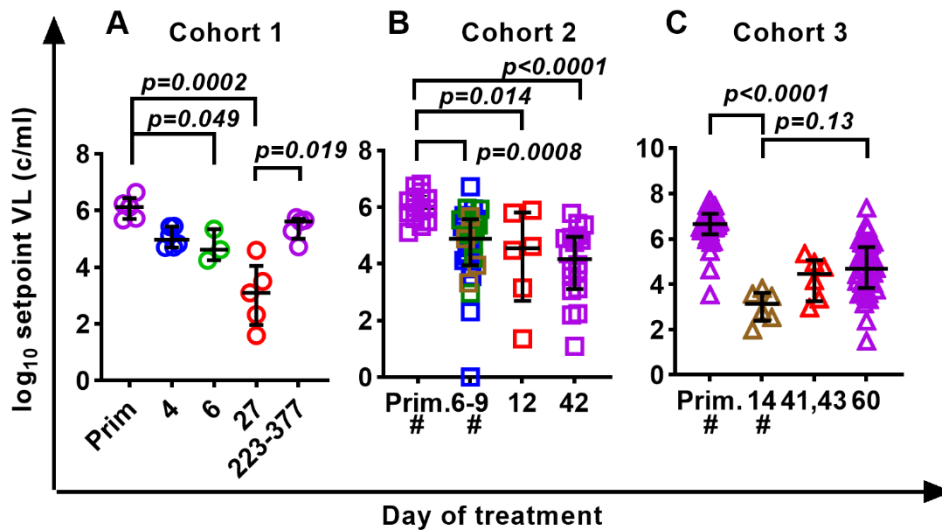

**Fig. A: Dynamics of the post-rebound setpoint viral load broken down by cohort.** # Time-weighted set-point viral loads were averaged over shorter time intervals for some animals. Descriptive statistics and statistical comparisons of the groups treated on different days are summarised in the tables below:

**A. Cohort 1.**

| Descriptive Statistics |        |        |        |       |         |
|------------------------|--------|--------|--------|-------|---------|
| Statistic              | Groups |        |        |       |         |
|                        | Prim   | 4      | 6      | 27    | 223-377 |
| Median                 | 6.131  | 4.983  | 4.626  | 3.104 | 5.618   |
| 25% Percentile         | 5.707  | 4.711  | 4.249  | 1.967 | 5.010   |
| 75% Percentile         | 6.447  | 5.445  | 5.349  | 4.054 | 5.714   |
| Mean                   | 6.088  | 5.046  | 4.741  | 3.029 | 5.413   |
| Std. Deviation         | 0.3984 | 0.3456 | 0.5592 | 1.145 | 0.4201  |

| Dunn's multiple comparisons test |                  |
|----------------------------------|------------------|
| Groups                           | Adjusted P Value |
| Prim vs. 6                       | 0.0490           |
| Prim vs. 27                      | 0.0002           |
| 27 vs. 223-377                   | 0.0194           |
| Prim vs. 4                       | 0.0902           |

**B. Cohort 2.**

| Descriptive Statistics |        |       |       |       |
|------------------------|--------|-------|-------|-------|
| Statistic              | Groups |       |       |       |
|                        | Prim.  | 6-9   | 12    | 42    |
| Median                 | 5.970  | 4.888 | 4.551 | 4.163 |
| 25% Percentile         | 5.577  | 3.946 | 2.698 | 3.112 |
| 75% Percentile         | 6.398  | 5.578 | 5.813 | 4.952 |
| Mean                   | 6.007  | 4.607 | 4.214 | 4.009 |
| Std. Deviation         | 0.5151 | 1.379 | 1.723 | 1.280 |

| Dunn's multiple comparisons test |                  |
|----------------------------------|------------------|
| Groups                           | Adjusted P Value |
| Prim. vs. 6-9                    | 0.0008           |
| Prim. vs. 12                     | 0.0138           |
| Prim. vs. 42                     | <0.0001          |

**C. Cohort 3.**

| <b>Descriptive Statistics</b> |               |        |        |       |
|-------------------------------|---------------|--------|--------|-------|
| <b>Statistic</b>              | <b>Groups</b> |        |        |       |
|                               | Prim.         | 14     | 41,43  | 60    |
| <b>Median</b>                 | 6.660         | 3.142  | 4.455  | 4.678 |
| <b>25% Percentile</b>         | 6.211         | 2.399  | 3.256  | 3.839 |
| <b>75% Percentile</b>         | 7.106         | 3.626  | 5.065  | 5.644 |
| <b>Mean</b>                   | 6.556         | 3.032  | 4.257  | 4.693 |
| <b>Std. Deviation</b>         | 0.7852        | 0.7077 | 0.9447 | 1.175 |

| <b>Dunn's multiple comparisons test</b> |                         |
|-----------------------------------------|-------------------------|
| <b>Groups</b>                           | <b>Adjusted P Value</b> |
| <b>14 vs. Prim.</b>                     | <0.0001                 |
| <b>14 vs. 41,43</b>                     | 0.8986                  |
| <b>14 vs. 60</b>                        | 0.1250                  |

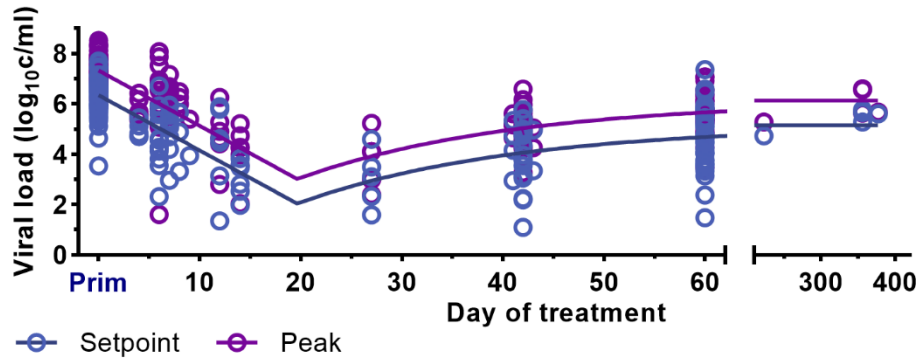

**Fig B: The simultaneous fit of function (2) to  $\log_{10}$  setpoint and peak viral load after rebound.** Function (2) fitted to both setpoint and peak viral loads with the same parameters except for the maximal value,  $b_0$  suggests that peak is approximately 10-fold higher than setpoint independent of the timing of ART initiation (shift on Y-axes is equal to  $0.98 \log_{10}$  c/ml). Function (2) fitted with independent parameters for both datasets does not have a statistically better fit (F-Test's  $p$ -value = 0.91). The best-fit parameters for both models are in Table B

| <i>Model with the different parameters for each dataset</i>                       |                          |                     |                 |          |           |           |          |
|-----------------------------------------------------------------------------------|--------------------------|---------------------|-----------------|----------|-----------|-----------|----------|
| Dataset                                                                           |                          | $b_0$               | $b_1$           | $k_1$    | $t_{min}$ | $\delta$  |          |
| Setpoint<br>(Fig 2B)                                                              | Best-fit values          | 6.343               | -0.2226         | 0.03675  | 18.53     | -0.9484   |          |
|                                                                                   | Lower 95%<br>conf. limit | 6.102               | -0.2651         | 0.005544 | 13.57     | -1.824    |          |
|                                                                                   | Upper 95%<br>conf. limit | 6.584               | -0.1801         | 0.06795  | 23.49     | -0.9484   |          |
| Peaks<br>(Fig 2C)                                                                 | Best-fit values          | 7.337               | -0.216          | 0.06041  | 20.89     | -1.405    |          |
|                                                                                   | Lower 95%<br>conf. limit | 7.168               | -0.247          | 0.01564  | 17.05     | -1.960    |          |
|                                                                                   | Upper 95%<br>conf. limit | 7.506               | -0.1849         | 0.1052   | 24.73     | -0.8492   |          |
| <i>Model with the same parameters (except <math>b_0</math>) for both datasets</i> |                          |                     |                 |          |           |           |          |
|                                                                                   |                          | $b_0$<br>(Setpoint) | $b_0$<br>(Peak) | $b_1$    | $k_1$     | $t_{min}$ | $\delta$ |
| Setpoint and<br>peaks (Fig B)                                                     | Best-fit values          | 6.352               | 7.330           | -0.2192  | 0.0468    | 19.67     | -1.192   |
|                                                                                   | Lower 95%<br>conf. limit | 6.179               | 7.166           | -0.2449  | 0.01988   | 16.51     | -1.703   |
|                                                                                   | Upper 95%<br>conf. limit | 6.525               | 7.493           | -0.1935  | 0.07373   | 22.83     | -0.6800  |

**Table B: The best-fit parameters of the piecewise regression (equation (2)) fitted to the different datasets.** The model with different parameters for each dataset does not fit better than the model where only  $b_0$ -s are different for setpoint and peak dataset, as determined by the F-test,  $p$ -value =0.91.

| # of different parameters | Parameters that are different (all other parameters are shared) | AICc          |
|---------------------------|-----------------------------------------------------------------|---------------|
| 1                         | $b_0$                                                           | <b>-85.29</b> |
| 1                         | $b_1$                                                           | -33.86        |
| 1                         | $k$                                                             | -14.96        |
| 1                         | $\delta$                                                        | -13.83        |
| 1                         | $t_{min}$                                                       | -9.11         |
| 2                         | $b_0, t_{min}$                                                  | -83.31        |
| 2                         | $b_0, \delta$                                                   | -83.48        |
| 2                         | $b_0, b_1$                                                      | -83.23        |
| 2                         | $b_0, k$                                                        | -83.24        |
| 2                         | $b_1, t_{min}$                                                  | -31.85        |
| 2                         | $b_1, \delta$                                                   | -37.03        |
| 2                         | $b_1, k$                                                        | -34.44        |
| 2                         | $\delta, t_{min}$                                               | -13.36        |
| 2                         | $\delta, k$                                                     | -13.90        |
| 2                         | $k, t_{min}$                                                    | -12.91        |
| 0                         | All parameters are the same                                     | 14.84         |
| 5                         | All parameters are different                                    | -77.93        |

**Table C: Corrected AIC for models that differ between datasets of setpoint and peak viral load by parameters shown.** The model where the only different parameter is  $b_0$  has better fit according to AICc (Fig B and Table B).



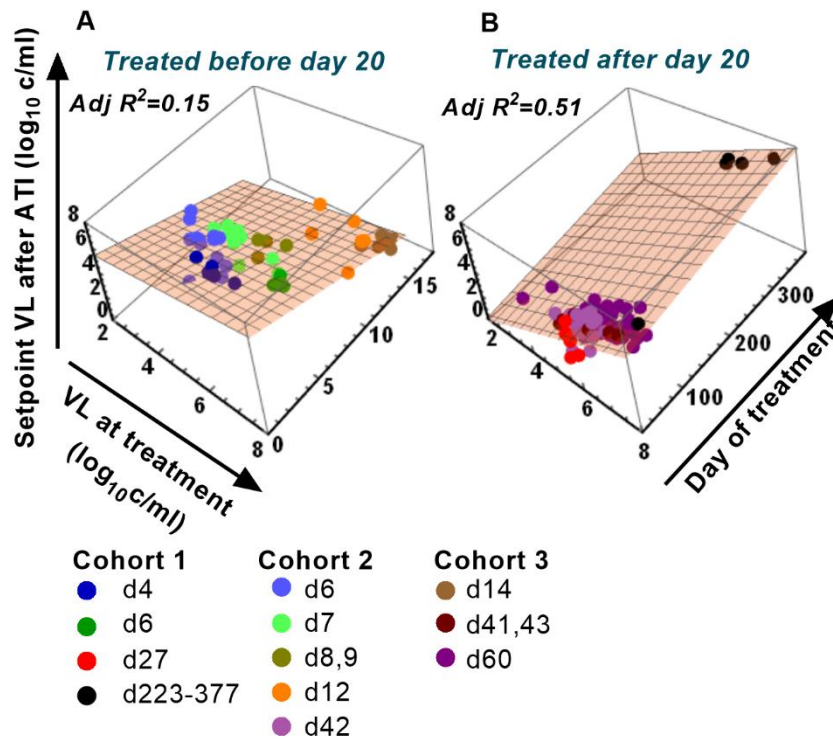

**Fig C: Prediction of setpoint viral load using a 2-variable model.**

A. For animals treated before day 20, timing of ART initiation is the strongest predictor of post-rebound setpoint VL (Fig 2D, main text). Adding data on the viral load at treatment initiation into the model did not significantly improve the fit (adjusted  $R^2=0.15$  vs  $0.13$ , p-value comparing model with day only and (day + VL) =  $0.17$ ).

B. For animals treated after day 20, viral load at treatment initiation is a good predictor of rebound setpoint viral load (Fig 2E, main text). Adding day of treatment as a factor significantly improves prediction (adjusted  $R^2=0.51$  vs adjusted  $R^2=0.4$ , p-value comparing VL only with (VL + day) models  $<0.0001$ ).

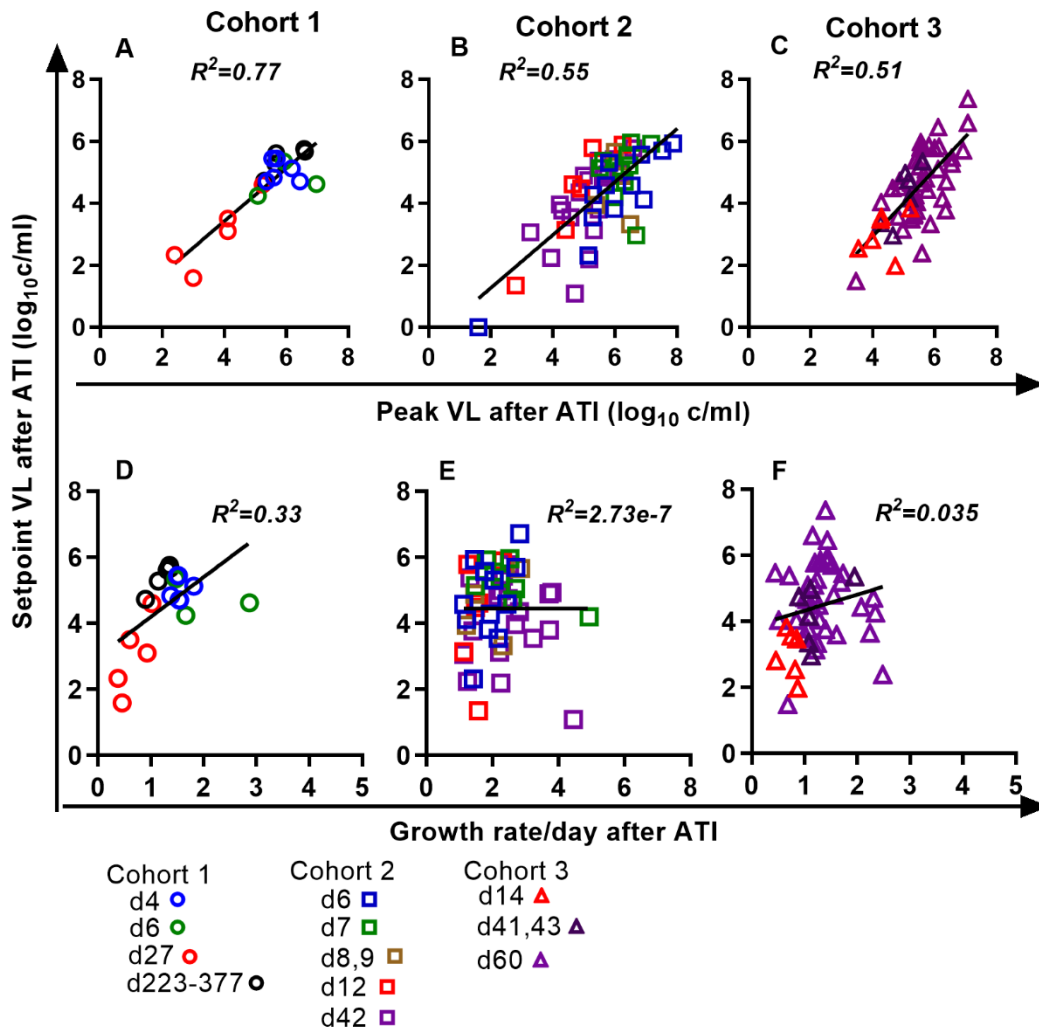

**Fig D: Relationship between early post-rebound viral parameters and later setpoint viral loads. A-C. Relationship between post-rebound peak and setpoint viral load.**

|                 | Correlation |         | Linear regression |           |           |
|-----------------|-------------|---------|-------------------|-----------|-----------|
|                 | Spearman r  | P value | Slope             | Intercept | R squared |
| <b>Cohort 1</b> | 0.7433      | 0.0003  | 0.8524            | 0.01562   | 0.7741    |
| <b>Cohort 2</b> | 0.6485      | <0.0001 | 0.8551            | -0.4399   | 0.5461    |
| <b>Cohort 3</b> | 0.6732      | <0.0001 | 1.075             | -1.368    | 0.5123    |

**D-F. Relationship between post-rebound viral growth rate and setpoint viral load.**

|                 | Correlation |         | Linear regression |           |            |
|-----------------|-------------|---------|-------------------|-----------|------------|
|                 | Spearman r  | P value | Slope             | Intercept | R squared  |
| <b>Cohort 1</b> | 0.3351      | 0.1608  | 1.203             | 2.995     | 0.3337     |
| <b>Cohort 2</b> | 0.1562      | 0.2890  | -0.0007501        | 4.453     | 2.725e-007 |
| <b>Cohort 3</b> | 0.3496      | 0.0111  | 0.4852            | 3.846     | 0.03469    |

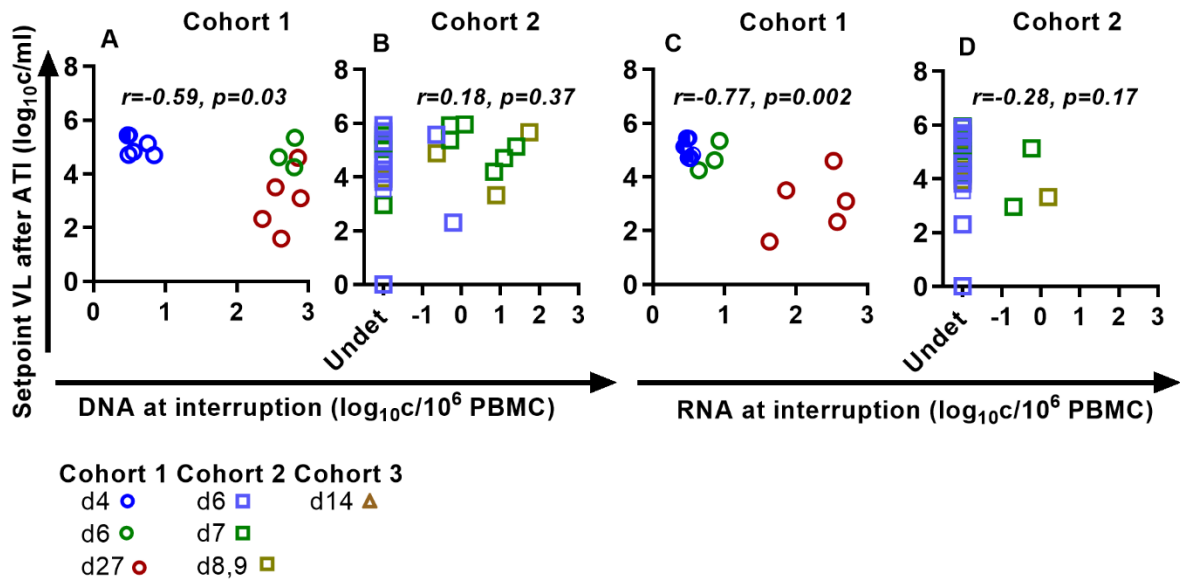

**Fig E: Latent proviral reservoir by cohorts.** (A, B) SIV DNA copies per million PBMC and (C, D) SIV RNA copies per million PBMC are negatively correlated with post-rebound control in groups from Cohort 1 (A, C) (Spearman  $r = -0.59$ ,  $p = 0.03$  for DNA, and  $r = -0.77$ ,  $p = 0.002$  for RNA), suggesting that larger reservoir size was associated with lower post-rebound setpoint viral load. However, no significant correlation was observed in data from Cohort 2 (B, D).

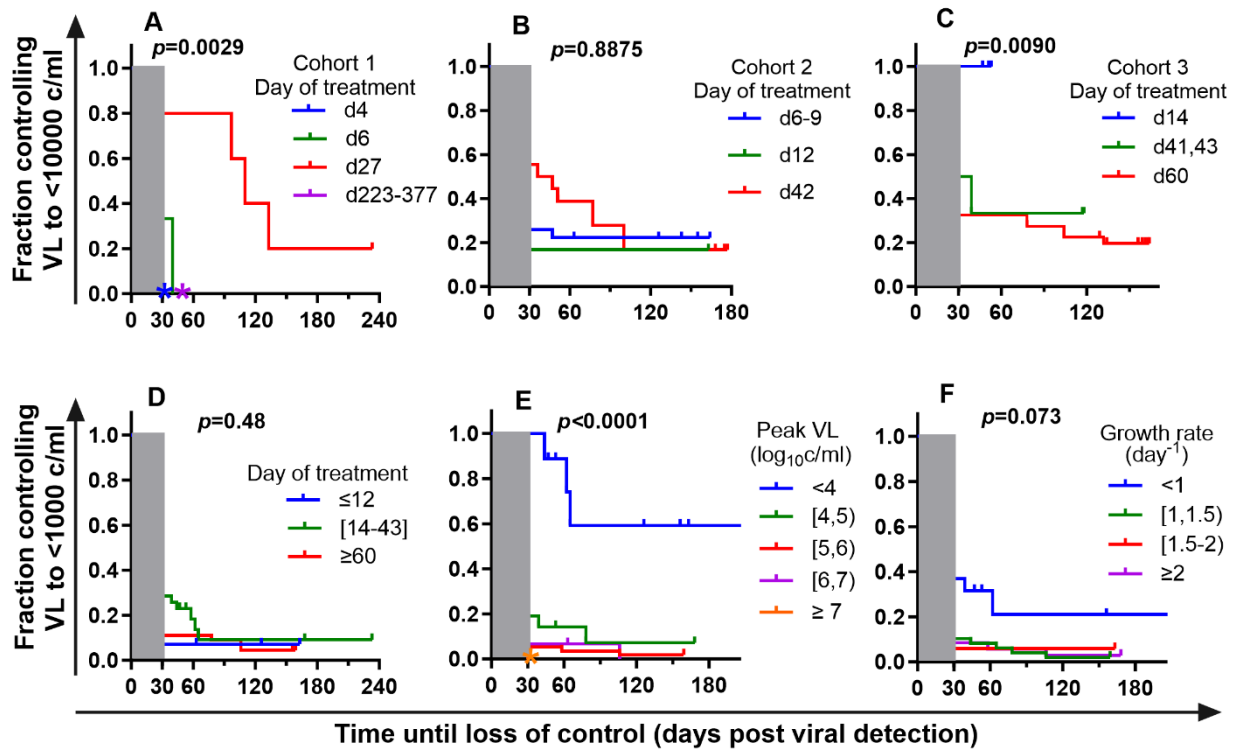

**Fig F: Duration of post-rebound viral control.** (A-C) The proportion of animals maintaining viral loads below 10,000 copies per ml over time post-rebound separated by cohort. The duration of control is significantly different between ART initiation groups in 2 of the 3 cohorts (p-values for the Log-rank test are shown in the figures).

(D-F) The Duration of post-rebound viral control below 1,000 copies per ml. (D) The proportion of animals maintaining viral control below 1,000 copies per ml is not significant (p-values for the Log-rank test are shown in the figures).

(E) Animals that have a low peak of the viral load during early rebound are more likely to maintain viral control below 1,000 copies per ml. (F) There is a trend for low viral growth rate during post-treatment rebound to be associated with longer-term control of post-rebound viral loads (not significant when considering four different levels of growth as shown,  $p = 0.073$ ). However, comparing groups with the growth rate  $<1$  and  $\geq 1$ , we observed significant differences in the duration of control -  $p$ -value = 0.0085.

Coloured stars indicate groups where all animals had viral loads greater than 10,000 copies per ml (A) or 1,000 copies per ml (E) at day 30 post-detection. In order to avoid the initial post-rebound peak of viral load in the analysis of the duration of viral control, the first 30 days after detection of virus are ignored (shaded grey).

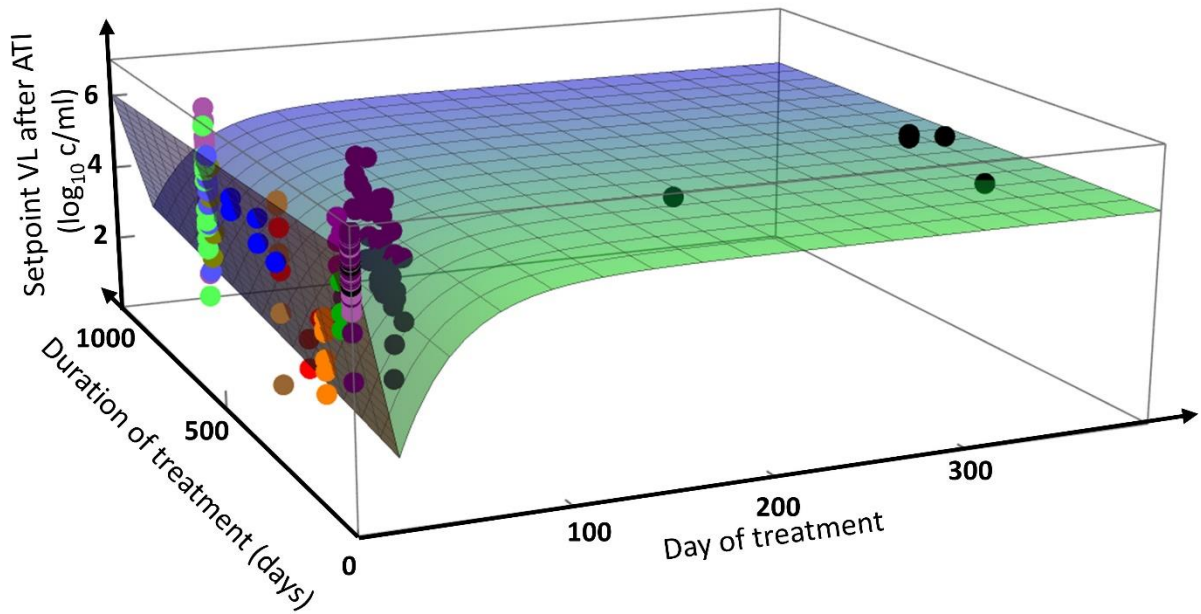

**Fig G: Relationship between exposure to virus pre-treatment, duration of treatment, and post-rebound setpoint viral load according to the model defined by formula (3).** Increasing exposure to virus before treatment leads to an initial decrease in post-rebound setpoint viral load (consistent with the priming of immune responses). However, further exposure to virus before treatment leads to increasing post-rebound setpoint viral load (consistent with immune exhaustion and/or viral escape). Prolonged treatment is associated with increased setpoint viral load post-rebound, which can be explained by the decline of immune memory and/or immune exhaustion due to exposure to low levels of viral antigen. We assume that setpoint at primary infection corresponds to the point when the day of treatment is equal to 0.

|                              | Best fit parameters with 95% confidence intervals |         |        |           |          |         |
|------------------------------|---------------------------------------------------|---------|--------|-----------|----------|---------|
|                              | $b_0$                                             | $b_1$   | $k_1$  | $t_{min}$ | $\delta$ | $k_2$   |
| <b>Best-fit values</b>       | 6.351                                             | -0.2383 | 0.0375 | 19.5813   | -0.9827  | 0.0004  |
| <b>Lower 95% conf. limit</b> | 6.1064                                            | -0.297  | 0.0073 | 14.0786   | -1.865   | -0.0004 |
| <b>Upper 95% conf. limit</b> | 6.5955                                            | -0.1796 | 0.0676 | 25.084    | -0.1005  | 0.0011  |

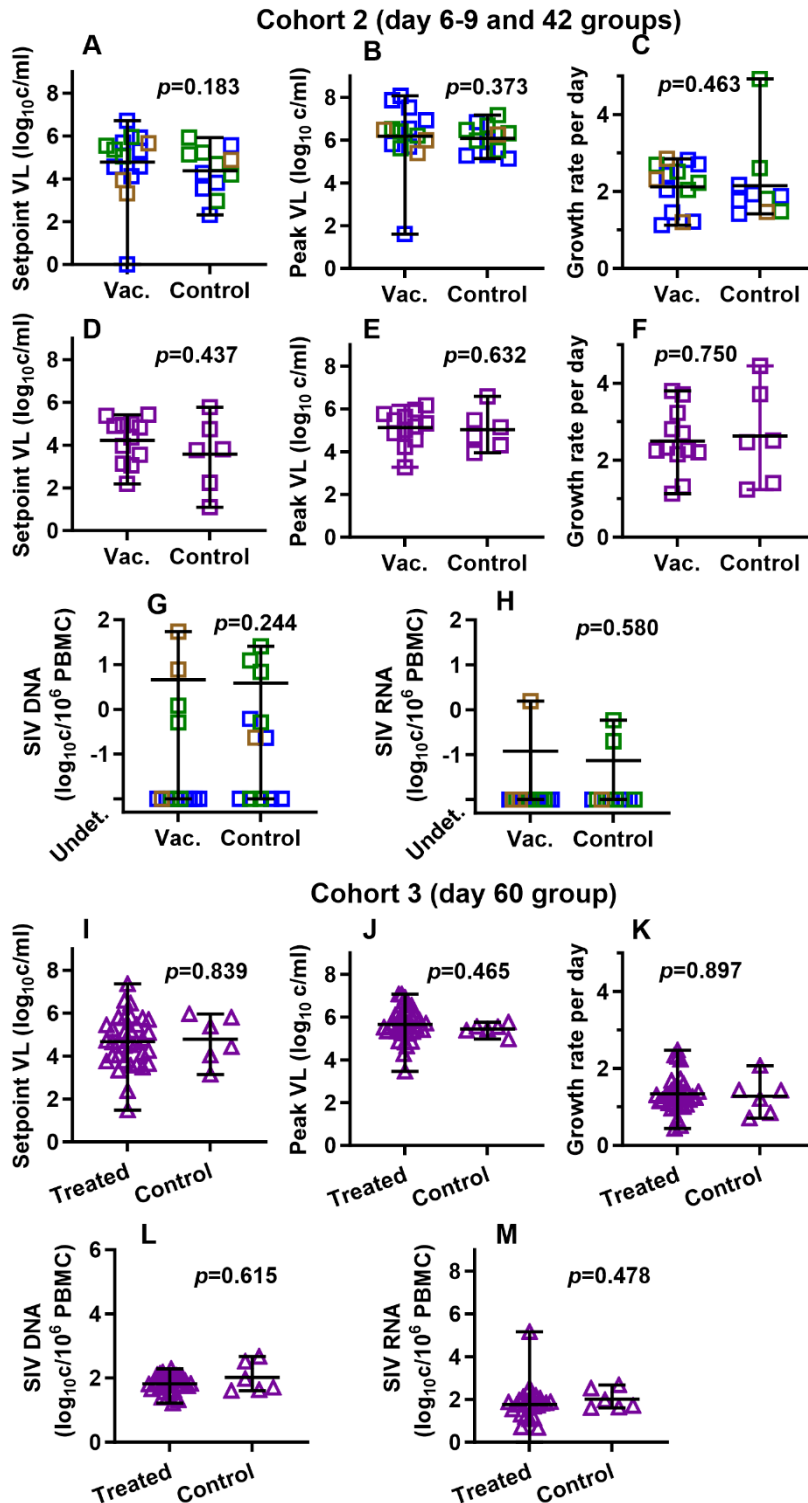

**Fig H: No statistically significant difference in the studied parameters in vaccinated (cohort 2) or treated with immune checkpoint blockade (cohort 3) subgroups and control subgroups.** Cohort 2, macaques treated with ART on days 6-9 and 42 (A-H) and cohort 3, macaques treated with ART on day 60 (I-M). No statistically significant difference between the median of vaccinated (cohort 2) or treated with ICB (cohort 3) and control subgroups by Mann-Whitney test with respect to the parameters discussed in the main text such as the rebound setpoint viral load (A, D, I), rebound peak viral load (B, E, J), rebound growth rate (C, F, K), SIV cell-associated DNA and RNA measured before ART interruption in cohort 2 (G, H) or on day 28 post-treatment in cohort 3 (L, M).

| <b>With the day 60 group.</b>                                                 |                                     |              |                                        |              |
|-------------------------------------------------------------------------------|-------------------------------------|--------------|----------------------------------------|--------------|
|                                                                               | <b>With random effect for slope</b> |              | <b>Without random effect for slope</b> |              |
|                                                                               | <b>Intercept</b>                    | <b>Slope</b> | <b>Intercept</b>                       | <b>Slope</b> |
| <b>Fixed effect</b>                                                           | 0.32813740                          | 0.01052793   | 0.03354471                             | 0.01126580   |
| <b>Random effect (day 4)</b>                                                  | 0.7491399                           | 0.010849268  | 0.6436764                              | na           |
| <b>Random effect (day 27)</b>                                                 | -0.2618696                          | 0.008771966  | -1.2774460                             | na           |
| <b>Random effect (day 60)</b>                                                 | 0.4971419                           | 0.011962558  | 0.7344037                              | na           |
| <b>p-value for parameter (F-test, anova() function)</b>                       | <0.0001                             | 2e-04        | <0.0001                                | <0.0001      |
| <b>p-value for model comparison (likelihood ratio test, anova() function)</b> | 0.6807                              |              |                                        |              |
| <b>Without the day 60 group.</b>                                              |                                     |              |                                        |              |
|                                                                               | <b>With random effect for slope</b> |              | <b>Without random effect for slope</b> |              |
|                                                                               | <b>Intercept</b>                    | <b>Slope</b> | <b>Intercept</b>                       | <b>Slope</b> |
| <b>Fixed effect</b>                                                           | 1.699270619                         | 0.005972253  | 1.699234311                            | 0.005972337  |
| <b>Random effect (day 4)</b>                                                  | 2.6909992                           | 0.005972647  | 2.6911134                              | na           |
| <b>Random effect (day 27)</b>                                                 | 0.7075421                           | 0.005971859  | 0.7073552                              | na           |
| <b>p-value for parameter (F-test, anova() function)</b>                       | 0.0013                              | 0.1002       | 0.0013                                 | 0.1002       |
| <b>p-value for model comparison (likelihood ratio test, anova() function)</b> | 0.9759                              |              |                                        |              |

**Table D. Best-fit parameter for the linear mixed effect model analysis of the relationship between the duration of treatment and the viral load setpoint at the rebound.** A comparison of models with and without random effects for slopes shows that adding random effects does not improve the fit suggesting a similar rate of decay of protection among the groups.

|                                 | <b>SIV DNA</b>   |              | <b>SIV RNA</b>   |              |
|---------------------------------|------------------|--------------|------------------|--------------|
|                                 | <b>Intercept</b> | <b>Slope</b> | <b>Intercept</b> | <b>Slope</b> |
| <b>Fixed effect</b>             | 4.4318997        | -0.0666468   | 4.2819562        | -0.2016088   |
| <b>Random effect (cohort 1)</b> | 4.431895         | -0.06671734  | 4.281987         | -0.2015914   |
| <b>Random effect (cohort 2)</b> | 4.431905         | -0.06657626  | 4.281925         | -0.2015763   |
| <b>p-value</b>                  | <0.0001          | 0.5618       | <0.0001          | 0.117        |

**Table E. Best-fit parameter for the linear mixed effect model analysis of the relationship between the duration of treatment and the viral load setpoint at the rebound.**

| Dataset            |                       | Best fit parameters with 95% confidence intervals |       |         |         |           |          |
|--------------------|-----------------------|---------------------------------------------------|-------|---------|---------|-----------|----------|
|                    |                       | $b_0$ protective                                  |       | $b_1$   | $k_1$   | $t_{min}$ | $\delta$ |
|                    |                       | +                                                 | -     |         |         |           |          |
| Setpoints (Fig 8A) | Best-fit values       | 5.846                                             | 6.495 | -0.2069 | 0.02910 | 19.46     | -0.5887  |
|                    | Lower 95% conf. limit | 5.502                                             | 6.250 | -0.2486 | 0.00922 | 14.95     | -1.477   |
|                    | Upper 95% conf. limit | 6.190                                             | 6.739 | -0.1653 | 0.04898 | 23.97     | 0.000    |
| Peaks              | Best-fit values       | 7.283                                             | 7.350 | -0.2140 | 0.05884 | 20.96     | -1.380   |
|                    | Lower 95% conf. limit | 7.015                                             | 7.173 | -0.2460 | 0.01532 | 17.14     | -1.954   |
|                    | Upper 95% conf. limit | 7.551                                             | 7.527 | -0.1820 | 0.1024  | 24.79     | -0.8056  |

**Table F. The best-fit parameters of the piecewise regression defined by formula (2).** The regression is fitted to the setpoint and peak viral loads according to the time of treatment and the presence or absence of protective MHC-class 1 alleles. The model in this table has different  $b_0$  for the different groups, with all other parameters the same between groups. The parameters of the model with the same  $b_0$  are in Table B.

| Number of parameters that differ between datasets | Parameters that are different for datasets with presence or absence of protective MHC-class 1 | AICc. Setpoint data | AICc. Peak data |
|---------------------------------------------------|-----------------------------------------------------------------------------------------------|---------------------|-----------------|
| 1                                                 | $b_0$                                                                                         | -6.716              | -91.46          |
| 1                                                 | $b_1$                                                                                         | 1.486               | -92.68          |
| 1                                                 | $k$                                                                                           | 1.683               | -91.21          |
| 1                                                 | $\delta$                                                                                      | 2.978               | -91.21          |
| 1                                                 | $t_{min}$                                                                                     | 6.46                | -91.25          |
| 2                                                 | $b_0, t_{min}$                                                                                | -4.948              | -89.56          |
| 2                                                 | $b_0, \delta$                                                                                 | -4.576              | -89.33          |
| 2                                                 | $b_0, b_1$                                                                                    | -4.581              | -90.64          |
| 2                                                 | $b_0, k$                                                                                      | -4.877              | -89.32          |
| 2                                                 | $b_1, t_{min}$                                                                                | 5.138               | -91.11          |
| 2                                                 | $b_1, \delta$                                                                                 | 1.994               | -90.56          |
| 2                                                 | $b_1, k$                                                                                      | 2.003               | -90.67          |
| 2                                                 | $\delta, t_{min}$                                                                             | 5.056               | -89.26          |
| 2                                                 | $\delta, k$                                                                                   | 3.792               | -89.04          |
| 2                                                 | $k, t_{min}$                                                                                  | 0.1138              | -90.17          |
| 0                                                 | All parameters are the same                                                                   | 5.927               | -93.34          |
| 5                                                 | All parameters are different                                                                  | -4.48               | -85.73          |

**Table G: Corrected AIC for models that differ by parameter shown between setpoint and peak viral load datasets with presence or absence of protective MHC-class 1 alleles.** The model with  $b_0$  as the only different parameter has better fit when fitting to setpoint viral loads, however for the peak viral load the best-fit model has the same parameters for datasets with the presence or absence of protective MHC-class 1 alleles.



| Parameter                                                                | Correlation with post-rebound setpoint viral load | p-value   | Test                                                                                                                       |
|--------------------------------------------------------------------------|---------------------------------------------------|-----------|----------------------------------------------------------------------------------------------------------------------------|
| Viral load at treatment initiation                                       | Adjusted R <sup>2</sup> = 0.040                   | p=0.016   | Linear regression. F-test                                                                                                  |
| Peak viral load in primary infection (all cohorts)                       | Adjusted R <sup>2</sup> = -0.008                  | p=0.79    | Linear regression. F-test.                                                                                                 |
| Viral load at treatment initiation (treated <day 20 post-infection)      | Adjusted R <sup>2</sup> = 0.0016                  | p=0.31    | Linear regression. F-test.                                                                                                 |
| Day of treatment (treated < day 20)                                      | Adjusted R <sup>2</sup> = 0.13                    | p=0.0077  | Linear regression. F-test.                                                                                                 |
| Day of treatment and viral load at treatment initiation                  | Adjusted R <sup>2</sup> =0.15                     | p=0.16    | Multivariate linear regression. F-test of the day of treatment and viral load at treatment initiation vs. day of treatment |
| Viral load at treatment initiation (treated >day 20 post-infection)      | Adjusted R <sup>2</sup> = 0.40                    | p <0.0001 | Linear regression. F-test.                                                                                                 |
| Peak viral load in primary infection (treated>day 20 post-infection)     | Adjusted R <sup>2</sup> = 0.11                    | p=0.0024  | Linear regression. F-test.                                                                                                 |
| Duration of treatment (day 4, day 27 and day 60 groups)                  | Fixed effect slope =0.011                         | p<0.0001  | Linear mixed effect model. t-test.                                                                                         |
| Duration of treatment (day 4, day 27)                                    | Fixed effect slope =0.006                         | p=0.1     | Linear mixed effect model. t-test.                                                                                         |
| Frequency of reactivation (cohort 1 - d4, 27; Cohort 3 – d14)            | r=-0.58                                           | p=0.016   | Spearman coefficient of correlation                                                                                        |
| DNA at interruption (Cohort 1 - d4, d6, d27 and Cohort 2 – d6, d7, d8-9) | Fixed effect slope=-0.066                         | p=0.56    | Linear mixed effect model. t-test.                                                                                         |
| RNA at interruption (Cohort 1 - d4, d6, d27 and Cohort 2 – d6, d7, d8-9) | Fixed effect slope=-0.202                         | p=0.117   | Linear mixed effect model. t-test.                                                                                         |
| DNA at interruption (Cohort 1 - d4, d6, d27)                             | r=-0.59                                           | p=0.03    | Spearman coefficient of correlation                                                                                        |
| DNA at interruption (Cohort 2 – d6, d7, d8-9)                            | r=-0.18                                           | p=0.37    | Spearman coefficient of correlation                                                                                        |
| RNA at interruption (cohort 1- d4, d6, d27)                              | r=-0.77                                           | p=0.002   | Spearman coefficient of correlation                                                                                        |
| RNA at interruption (Cohort 2 – d6, d7, d8-9)                            | r=-0.28                                           | p=0.17    | Spearman coefficient of correlation                                                                                        |
| Time to detection (Cohort 1)                                             | N/A                                               | p=0.83    | Log-rank (Mantel-Cox) test                                                                                                 |
| Time to detection (Cohort 2)                                             | N/A                                               | p=0.56    | Log-rank (Mantel-Cox) test                                                                                                 |
| Time to detection (Cohort 3)                                             | N/A                                               | p=0.13    | Log-rank (Mantel-Cox) test                                                                                                 |
| CD107a (Cohort 1, d4, d27)                                               | r=-0.82                                           | p=0.0031  | Spearman coefficient of correlation                                                                                        |
| Total CD8+ Response (Cohort 2, d6, d7, d8-9 Control)                     | r=0.08                                            | p=0.80    | Spearman coefficient of correlation                                                                                        |
| Total CD8+ Response (Cohort 2, d6, d7, d8-9 Vaccinated)                  | r=-0.22                                           | p=0.42    | Spearman coefficient of correlation                                                                                        |

**Table H: Summary of correlation analysis of parameters discussed in the main text of the manuscript.**

## Supplementary method.

### Estimation of the duration of control

In order to estimate the duration of control, i.e. duration of VL below a nominated control threshold (CT), we ignore the initial 30 days post detection of virus (let us call the time after these 30 days a post-peak time - PPT) and we do not count these 30 days toward the estimate of the duration of control. The definition of the duration of control is based on 6 possible scenarios. The first three scenarios concern animals with at least two VL measurements during PPT:

- 1) We consider that the control is lost if two consecutive measurements during PPT are above the CT of  $4 \log_{10}$  copies/ml. We define the loss of control to be at the first of the two measurements above CT, and the duration of control = first measurement above CT – 30. If the first and the second measurements during PPT are above CT, then the duration of control is defined as 0.
- 2) If the viral load does not exceed the threshold for two consecutive measurements during PPT and the last follow up time point is below CT, then we consider that control is not lost until the last measurement (inclusively) and we censor the subject at the last time point.
- 3) If there is no more than one consecutive measurement above CT during PPT and the last measurement is above the detection threshold, then we censor the animal at the second last point (as we cannot tell if control is lost at the last point).

Now, let us consider the cases when there are less than two points during PPT so we cannot apply the above criteria directly.

- 4) If there is only one measurement during PPT and the VL is less than CT, then we censor the subject at this point.
- 5) If there is only one measurement during PPT and the VL is greater than CT, then the subject is excluded from the study (as we cannot confirm if this measurement would have been followed by a second reading above the threshold).
- 6) The subject is also excluded from the study if the follow-up terminates before PPT.

## References

1. C. M. Fennessey *et al.*, Genetically-barcoded SIV facilitates enumeration of rebound variants and estimation of reactivation rates in nonhuman primates following interruption of suppressive antiretroviral therapy. *PLoS Pathog.* **13**, e1006359 (2017).
2. M. Pinkevych *et al.*, Predictors of SIV recrudescence following antiretroviral treatment interruption. *Elife* **8**, e49022 (2019).
3. A. A. Okoye *et al.*, Early antiretroviral therapy limits SIV reservoir establishment to delay or prevent post-treatment viral rebound. *Nat. Med.* **24**, 1430-1440 (2018).
4. M. Pino *et al.*, Limited impact of fingolimod treatment during the initial weeks of ART in SIV-infected rhesus macaques. *Nat. Commun.* **13**, 5055 (2022).
5. J. Harper *et al.*, CTLA-4 and PD-1 dual blockade induces SIV reactivation without control of rebound after antiretroviral therapy interruption. *Nat. Med.* **26**, 519-528 (2020).
